# Supplementary material for: Size does matter: 18 amino acids at the N-terminal tip of an amino acid transporter in Leishmania determine substrate specificity
Source: PubMed Central journal article supplement (PMC4637868; doi:10.1038/srep16289), 2015-11-09
Supplement: srep16289-s1.pdf [file srep16289-s1.pdf]

# Size does matter: 18 amino acids at the N-terminal tip of an amino acid transporter in *Leishmania* determine substrate specificity

Doreen Schlisselberg<sup>1</sup>, Eldar Mazarib<sup>1</sup>, Ehud Inbar<sup>1</sup>, Doris Rentsch<sup>2</sup>, Peter, J. Myler<sup>3,4,5</sup> and Dan Zilberstein<sup>1\*</sup>

## Supplementary Information

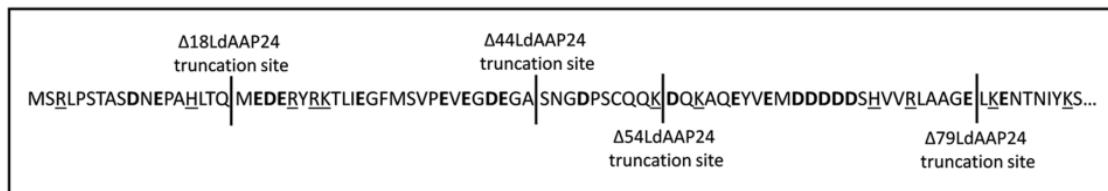

**Figure S1.** Amino-acid sequence of LdAAP24 N-terminus. Truncation sites for construct preparations are marked.

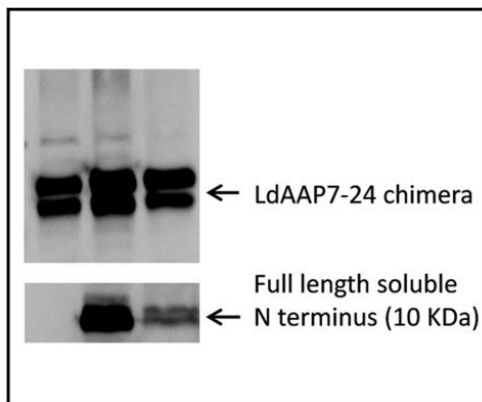

**Figure S2.** Western blot analysis of  $\Delta$ LdAAP24 ectopically co-expressing LdAAP7-24 chimera (43 KDa) and the full length N terminus (10 KDa).

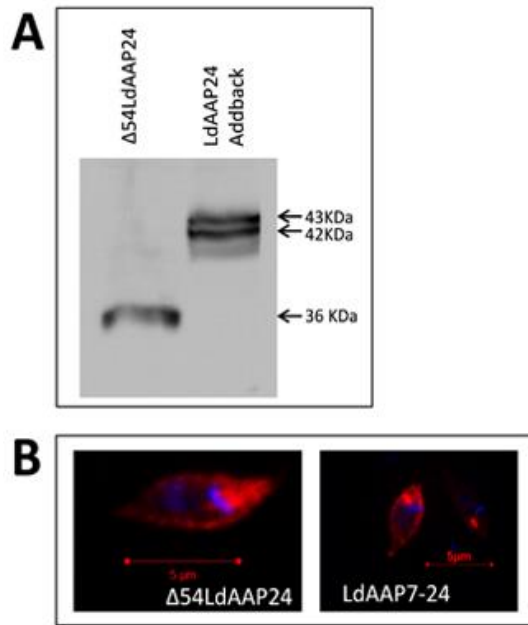

**Figure S3.** **A.** Western blot analysis on salt-extracted membranes<sup>28</sup> of  $\Delta LdAAP24$  promastigotes ectopically expressing LdAAP24 (42 and 43 KDa) or  $\Delta 54LdAAP24$  (36 KDa). Polyclonal anti-HA antibodies were used as primary antibodies. **B.** Indirect immunofluorescence of LdAAP24-null mutants ( $\Delta LdAAP24$ ) ectopically expressing  $\Delta 54LdAAP24$  or LdAAP7-24 chimera. Cells were stained with anti-HA antibodies (red) and the DNA stained with DAPI (blue), the latter stains the nucleus and the kinetoplast. The two fluorescent images were merged.

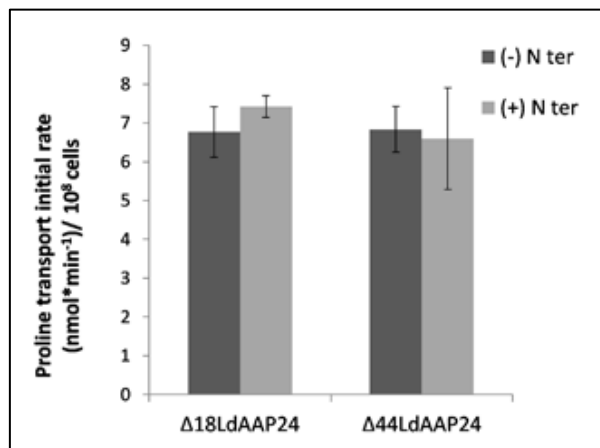

**Figure S4.** Initial transport rate (3 minutes) of 1 mM <sup>3</sup>H L-proline was assayed in LdAAP24-null mutants ectopically expressing  $\Delta 18LdAAP24$ /  $\Delta 44LdAAP24$  (-N<sup>0</sup>, dark grey) and LdAAP24-null mutants ectopically co-expressing  $\Delta 18LdAAP24$ /  $\Delta 44LdAAP24$  and the full length N terminus (+N<sup>0</sup>, light grey). Transport was determined at pH 7 and 30 °C. Values represent the mean of at least three independent repeats  $\pm$ SD.

**Supplementary Table S1. Primer-list.**

| <b>PCR target</b>        | <b>Primer</b>                                                                                                                                                                                                                            | <b>Restriction enzyme</b> | <b>Plasmid</b> |
|--------------------------|------------------------------------------------------------------------------------------------------------------------------------------------------------------------------------------------------------------------------------------|---------------------------|----------------|
| <b>LdAAP24 N'</b>        | Fw: AAAGCTCTCGAGATGTCCAGATTGCCAAGCACC<br>Rv: AAAGCTGGTACCCTACTTACCCAGGCGGTTTCATT<br>TCGATATCAGTGTAGGACTTGCAGATGTTTGTGTTTC                                                                                                                | XhoI<br>KpnI              | pNUS HnD       |
| <b>LdAAP24</b>           | Fw: AAAGCTCTCGAGATGTCCAGATTGCCAAGCACC<br>Rv: AAAGCTGGTACCCTATACACTGATATCGAAATG<br>AACCGCCTGGGTAAGGGACTTGCAGATGTTTGTGTTTC                                                                                                                 | XhoI<br>KpnI              | pNUS HnB       |
| <b>Δ18LdAAP24</b>        | Fw: AAAGCTCTCGAGATGGAGGACGAACGTTAC<br>Rv: AAAGCTGGTACCCTATACACTGATATCGAAATG<br>AACCGCCTGGGTAAGGGACTTGCAGATGTTTGTGTTTC                                                                                                                    | XhoI<br>KpnI              | pNUS HnB       |
| <b>Δ44LdAAP24</b>        | Fw: AAAGCTCTCGAGATGAGCAATGGAGACCCCTCC<br>Rv: AAAGCTGGTACCCTATACACTGATATCGAAATG<br>AACCGCCTGGGTAAGGGACTTGCAGATGTTTGTGTTTC                                                                                                                 | XhoI<br>KpnI              | pNUS HnB       |
| <b>Δ54LdAAP24</b>        | Fw: AAAGCTCTCGAGATGGACCAGAAGGCGCAGG<br>Rv: AAAGCTGGTACCCTATACACTGATATCGAAATG<br>AACCGCCTGGGTAAGGGACTTGCAGATGTTTGTGTTTC                                                                                                                   | XhoI<br>KpnI              | pNUS HnB       |
| <b>Δ79LdAAP24</b>        | Fw: ATTATTGGTACCATGACTGTCGTCCGCCT<br>Rv: AAAGCTGGTACCCTATACACTGATATCGAAATG<br>AACCGCCTGGGTAAGGGACTTGCAGATGTTTGTGTTTC                                                                                                                     | XhoI<br>KpnI              | pNUS HnB       |
| <b>LdAAP7-24 chimera</b> | Fw: ACTTATCTCGAGATGAGCGGCGCTAACCACCAC<br>Split Fw: CATCGAGAGGGTCTACTCCATCATGACTGTCGTCCGCCTCGC<br>Split Rv: GCGAGGCGGACGACAGTCATGATGGAGTAGACCCTCTCGATG<br>Rv: AAAGCTGGTACCCTATACACTGATATCGAAATG<br>AACCGCCTGGGTAAGGGACTTGCAGATGTTTGTGTTTC | XhoI<br>KpnI              | pNUS HnB       |
